# Supplementary material for: Rapid Structure Determination of Bioactive 4″-Tetrahydrofurfuryl Macrozone Reaction Mixture Components by LC-SPE/Cryo NMR and MS
Source: MDPI journal article supplement (doi:10.3390/molecules26206316), 2021-10-19
Supplement: s1 [file s1]

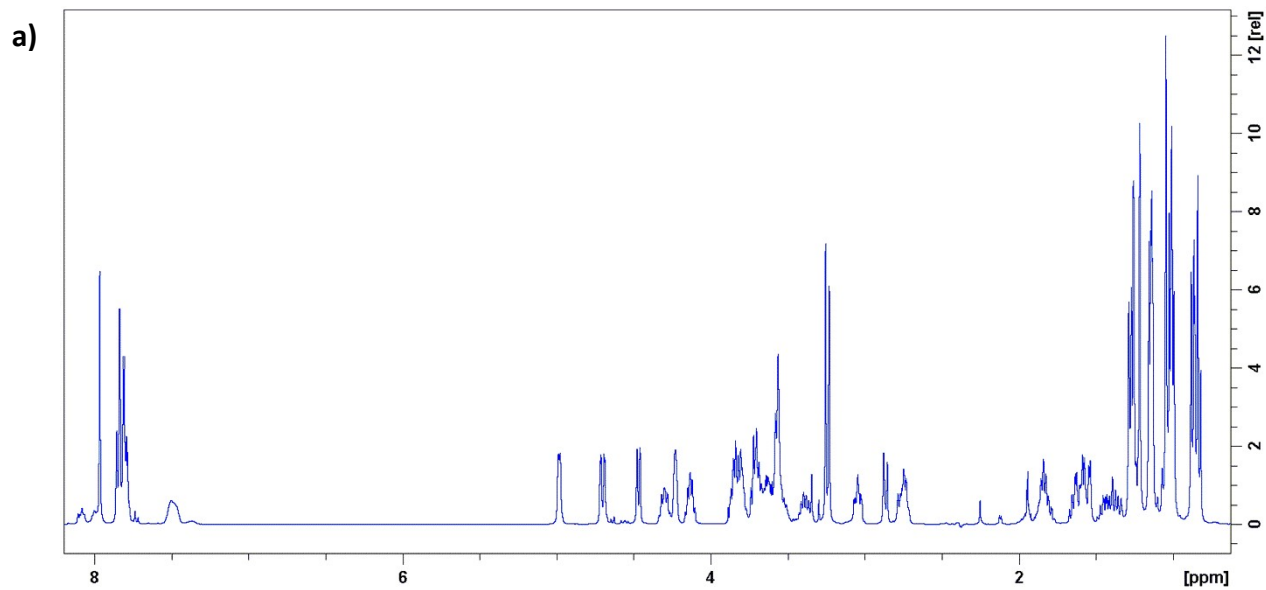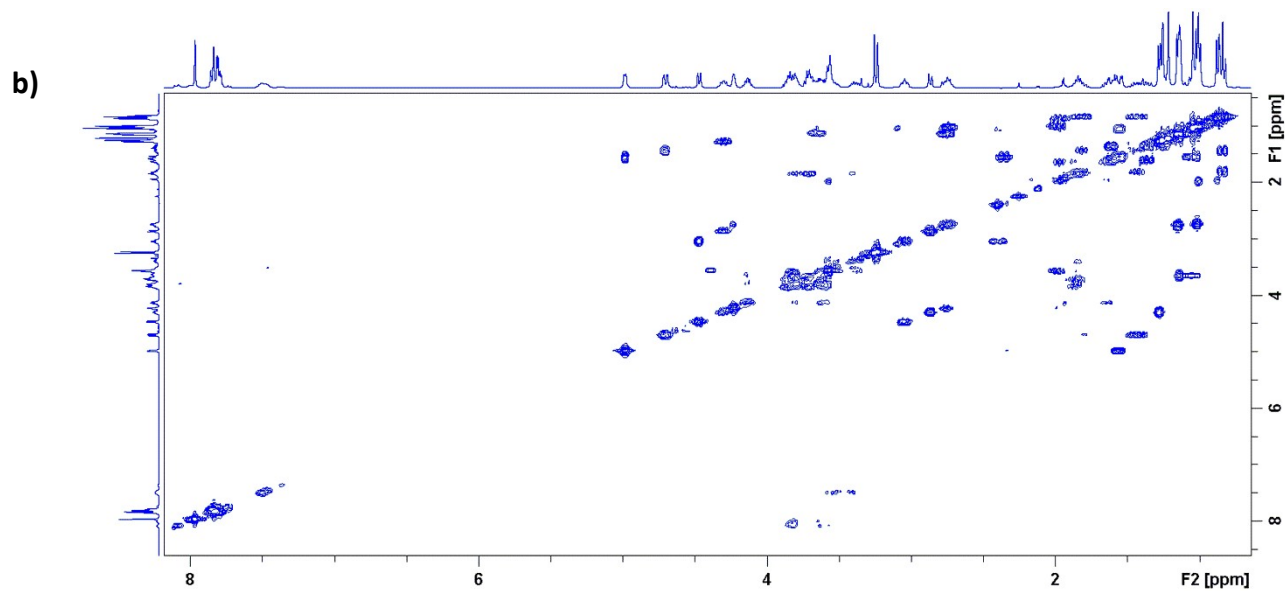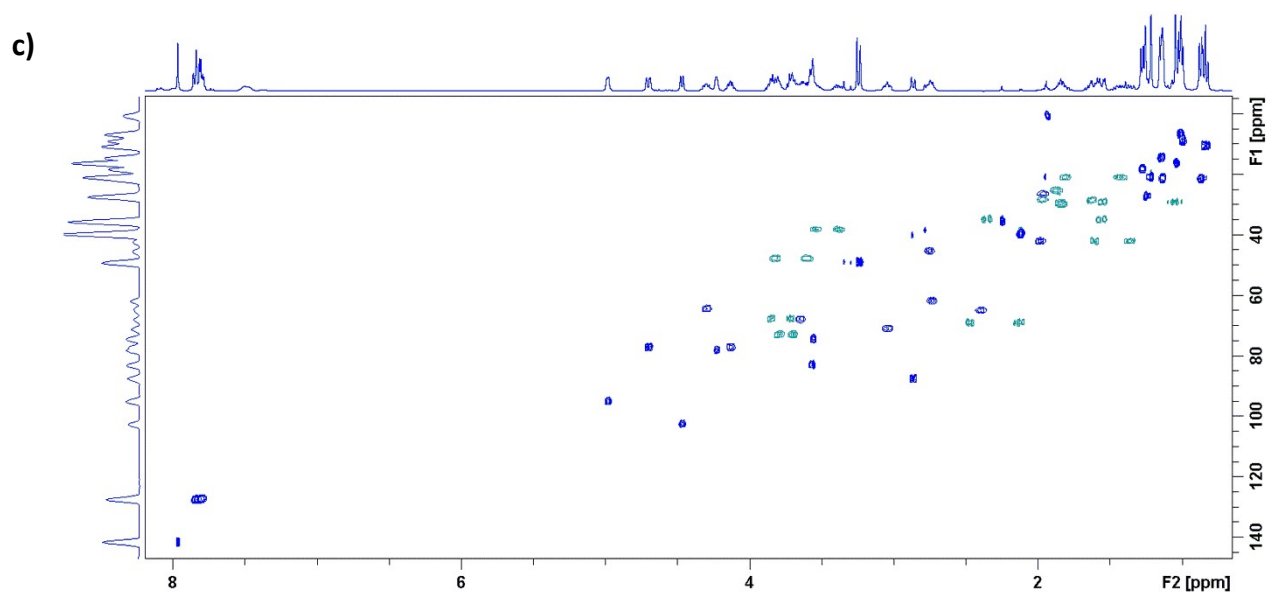

d)

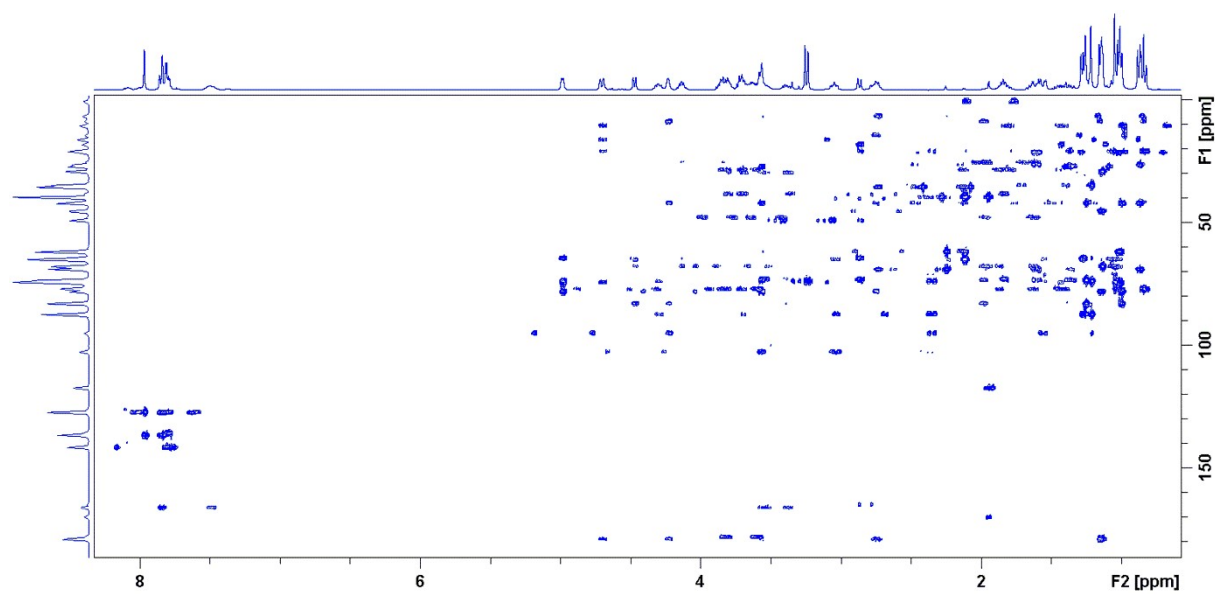

**Figure S1.** a) proton spectrum, b) COSY spectrum, c) HSQC spectrum and d) HMBC spectrum of the 4''-tetrahydrofurfuryl macrozone **3a**.

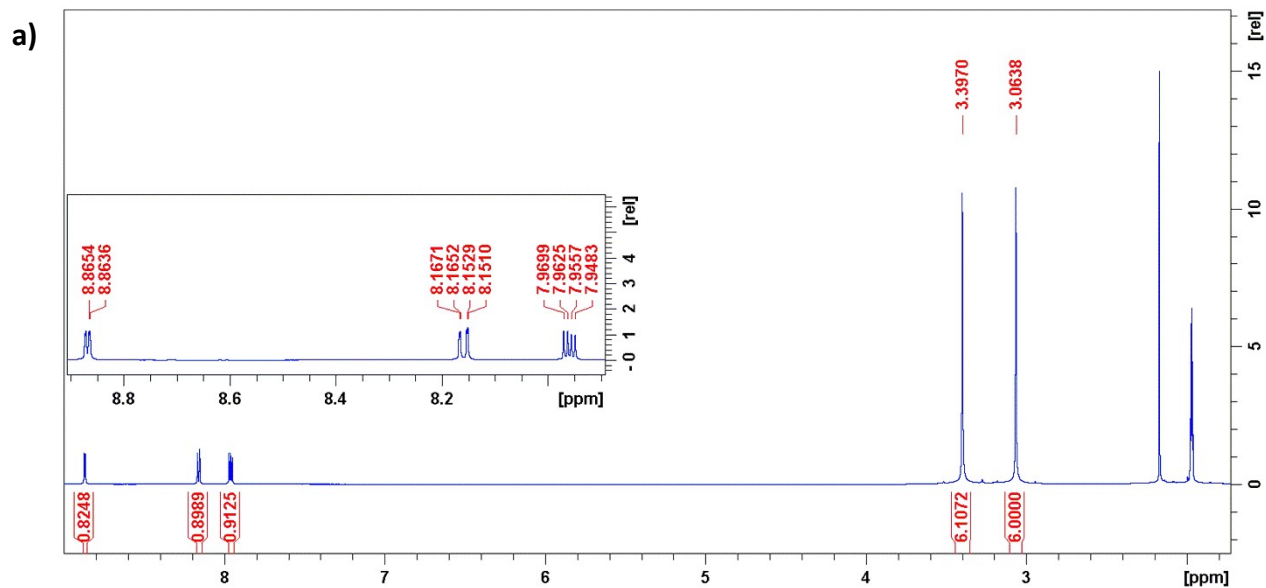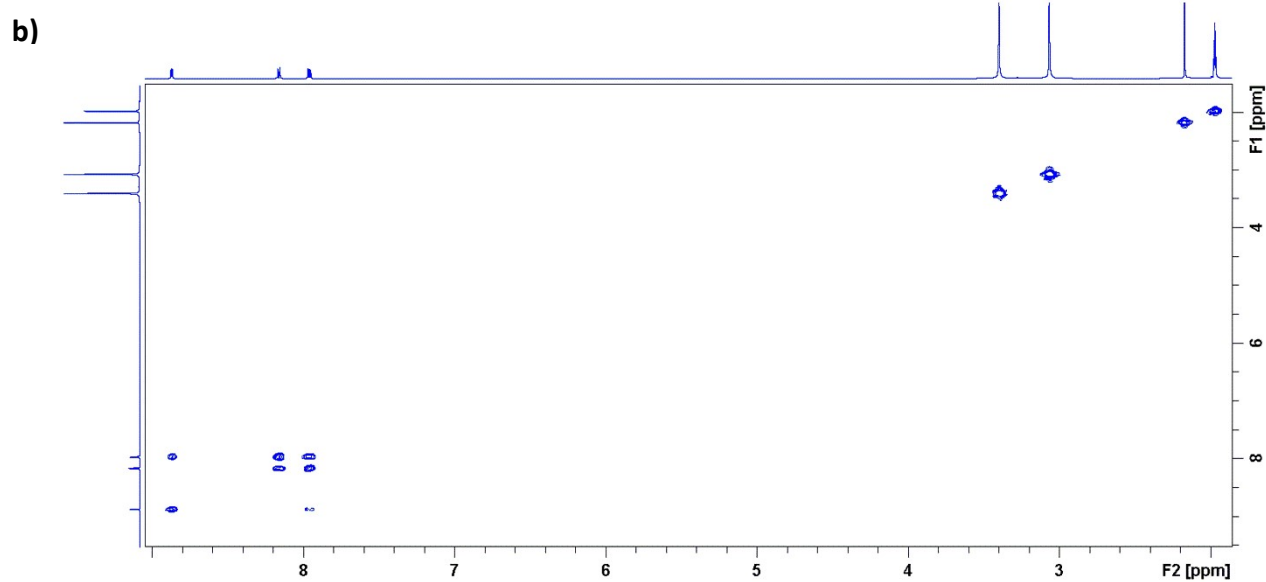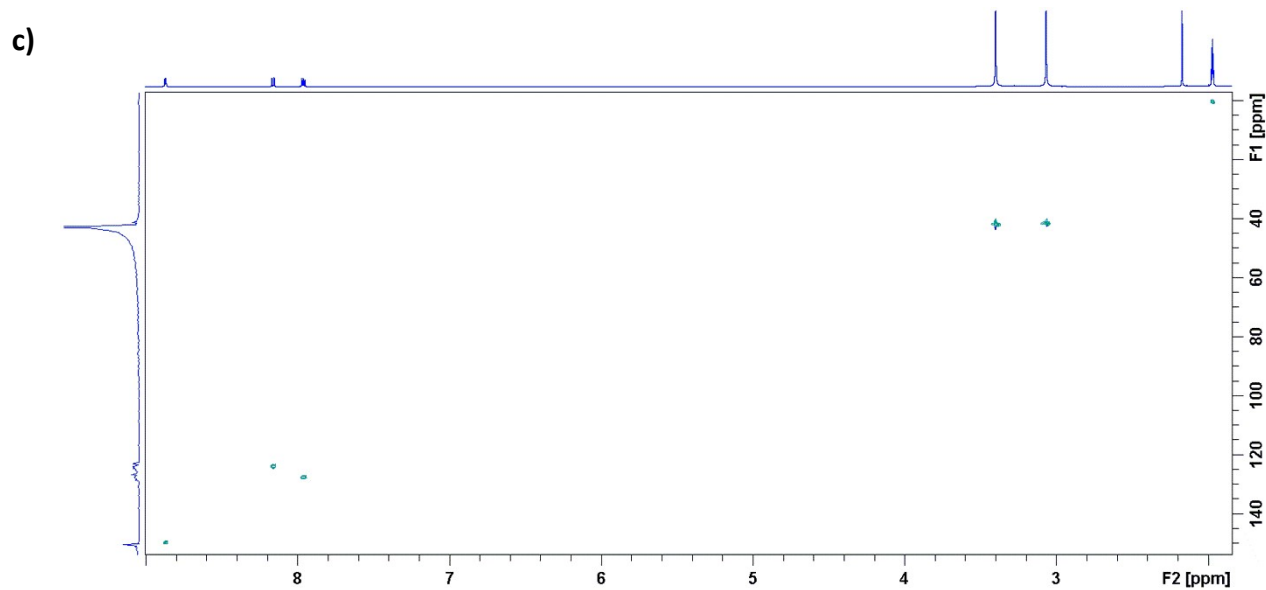

d)

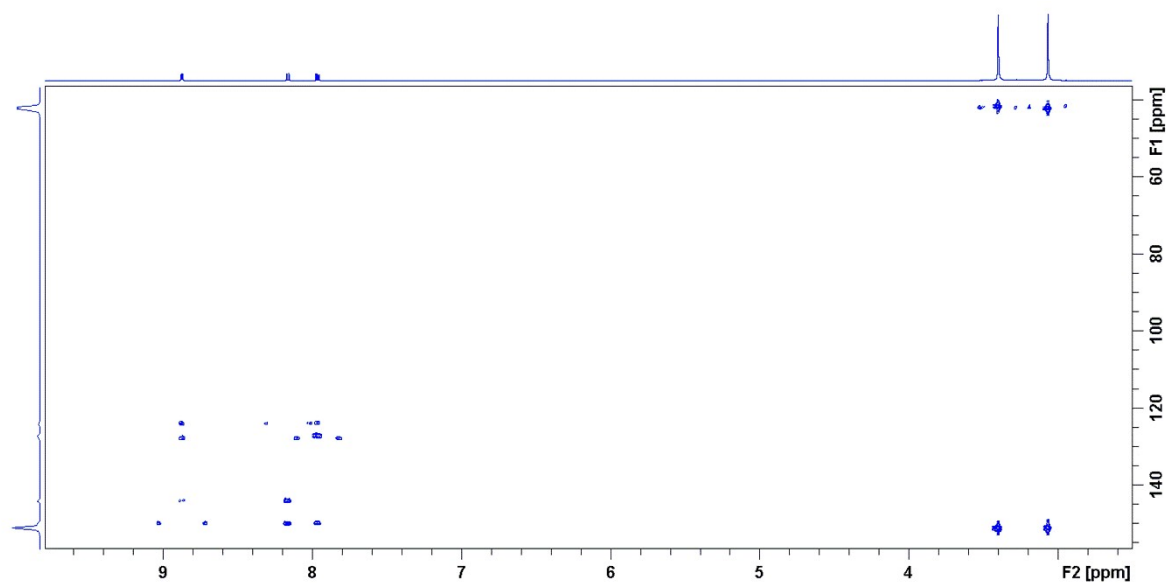

**Figure S2.** a) proton spectrum, b) COSY spectrum, c) HSQC spectrum and d) HMBC spectrum of the compound **3a-1 (HATU)**.

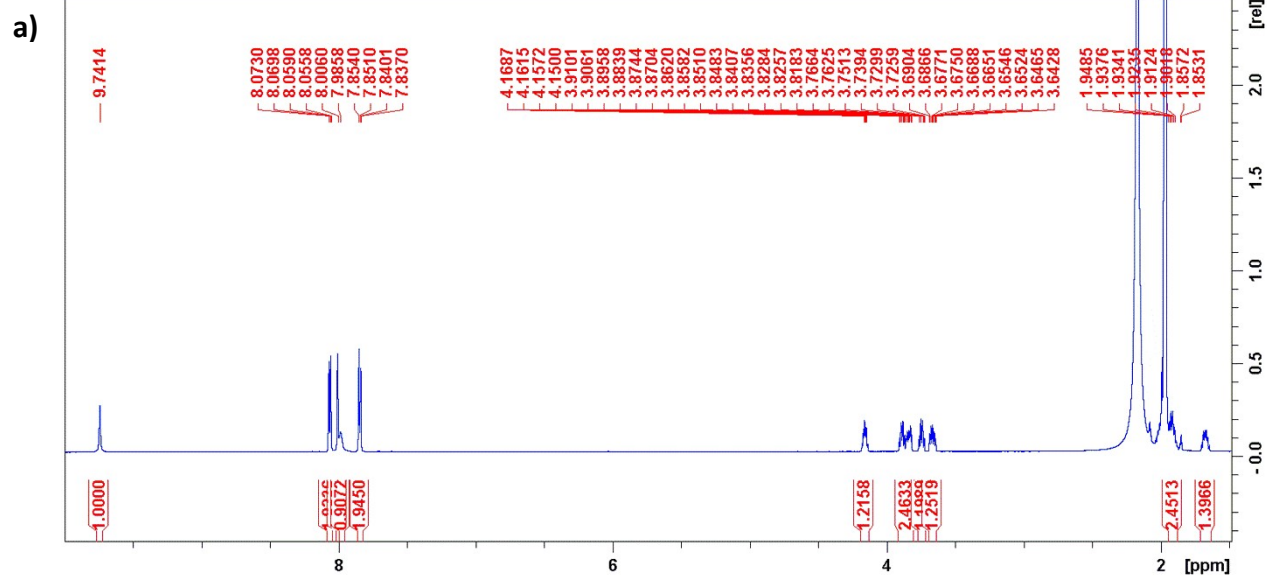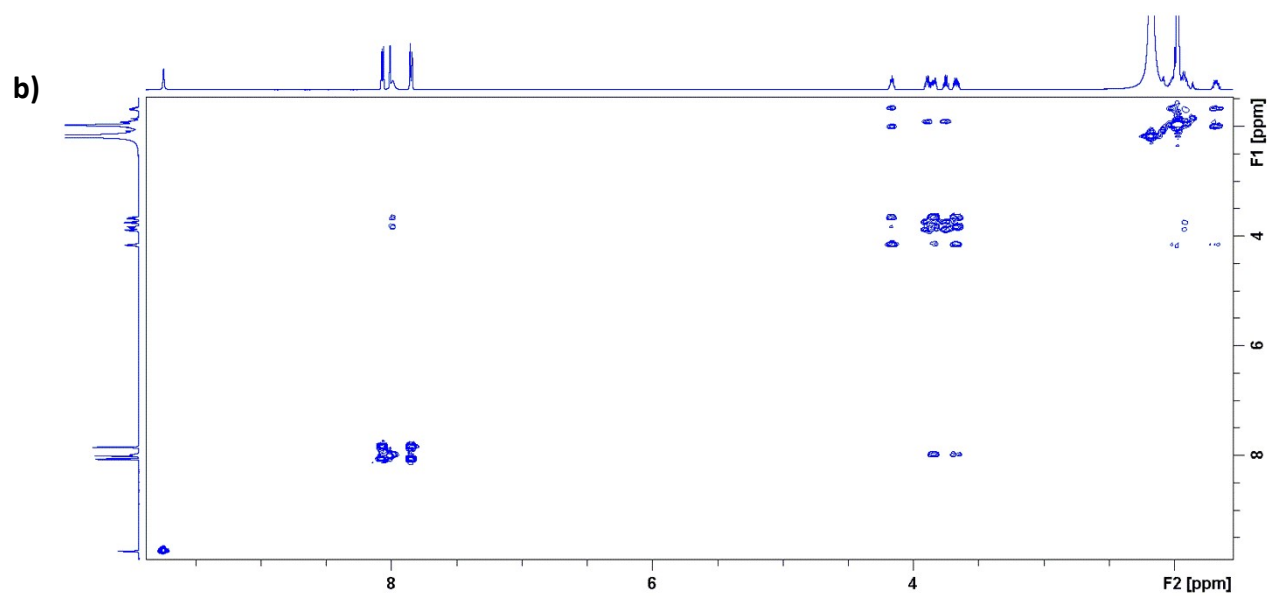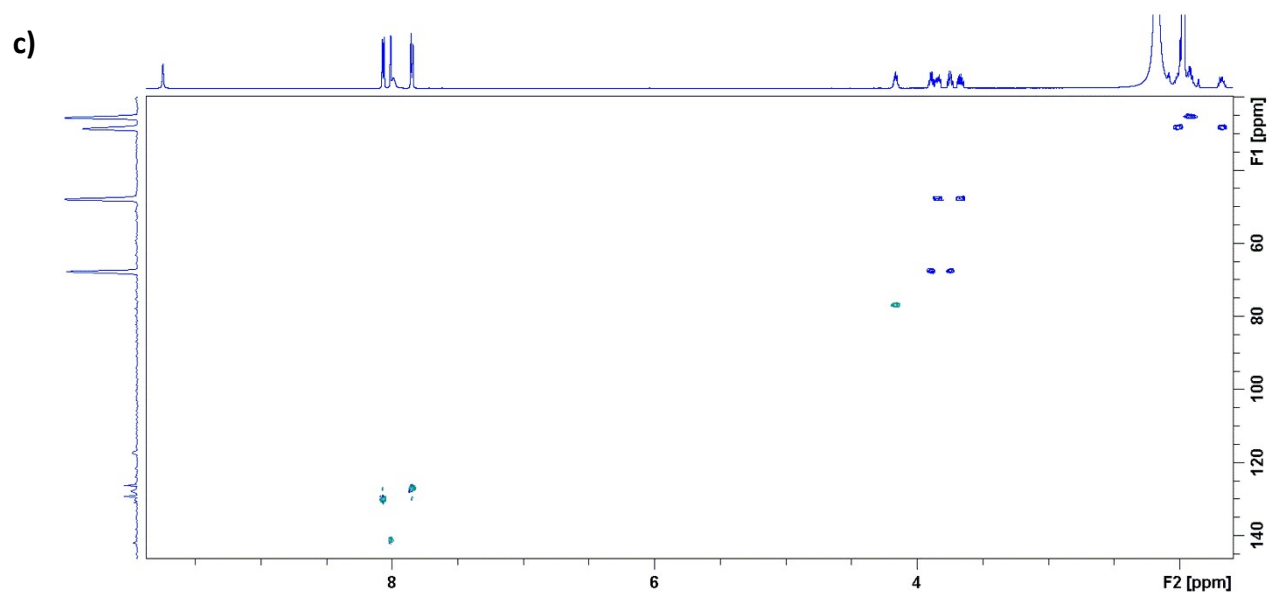

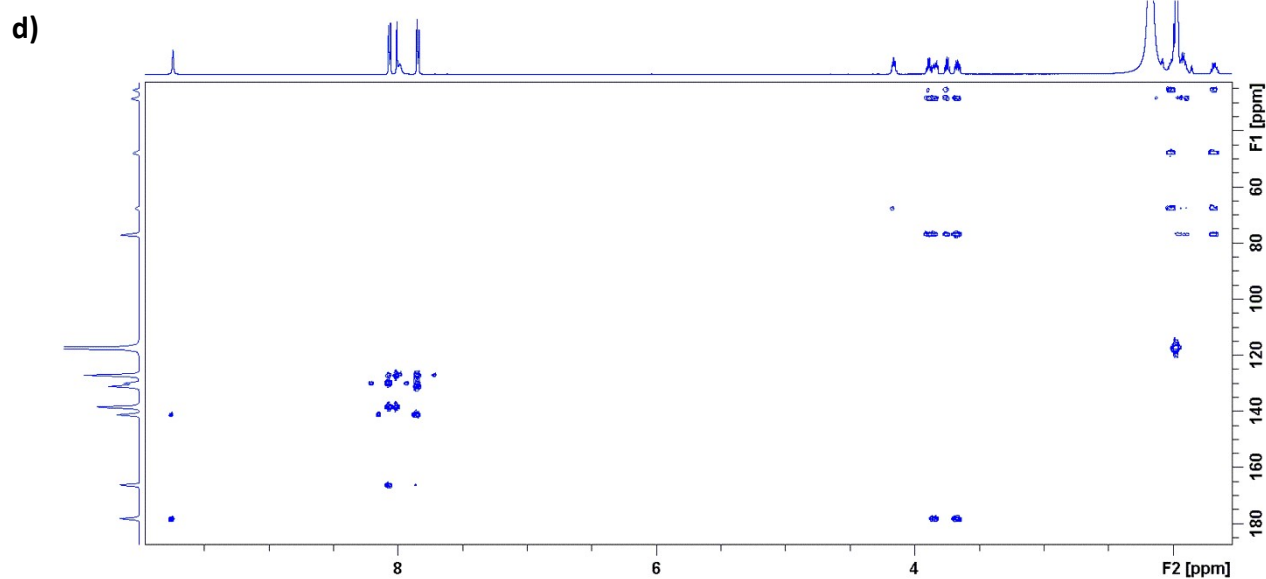

**Figure S3.** a) proton spectrum, b) COSY spectrum, c) HSQC spectrum and d) HMBC spectrum of the compound **3a-2 (reactant 2)**.

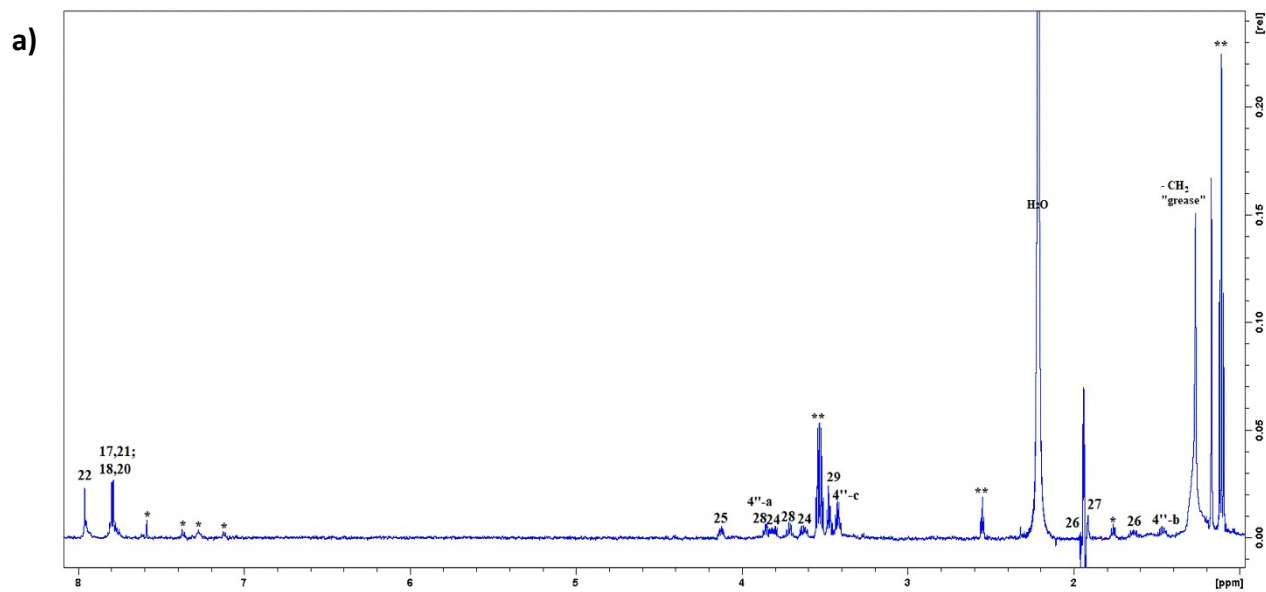

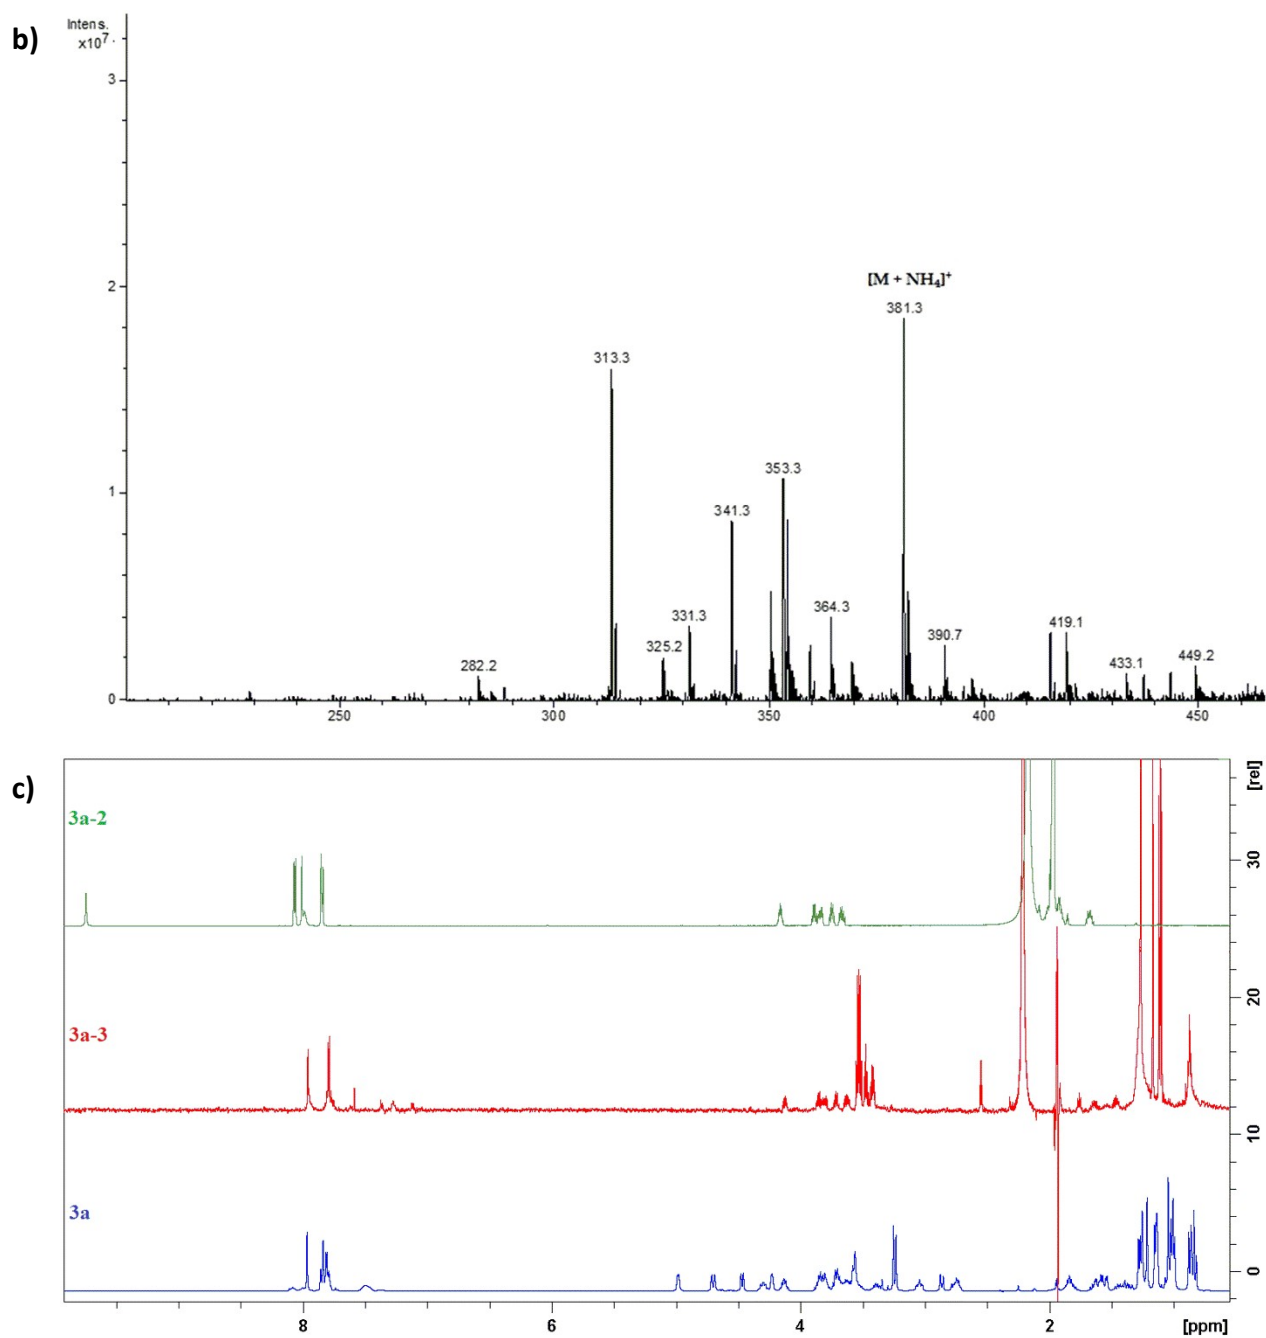

**Figure S4.** a) proton spectrum of the **3a-3** (signals from solvent impurities are marked with asterisk\* and signals from ethanol are marked with double asterisk\*\*), b) MS spectrum of the **3a-3** and c) overlaid proton spectra of the **3a**, **3a-2** and **3a-3**.

a)

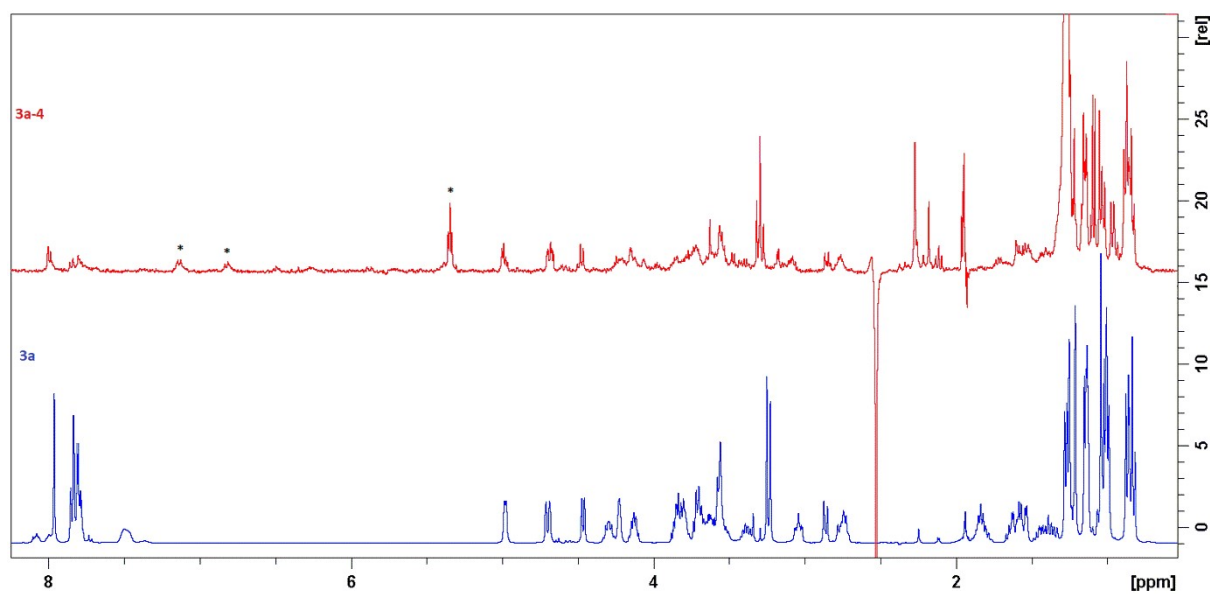

b)

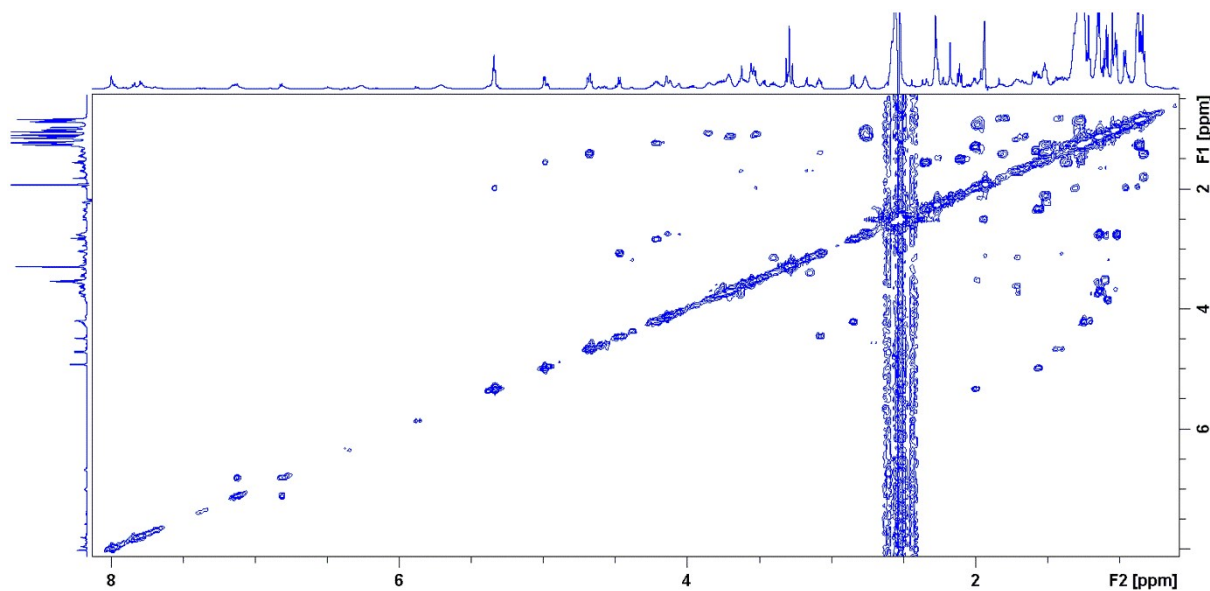



c)

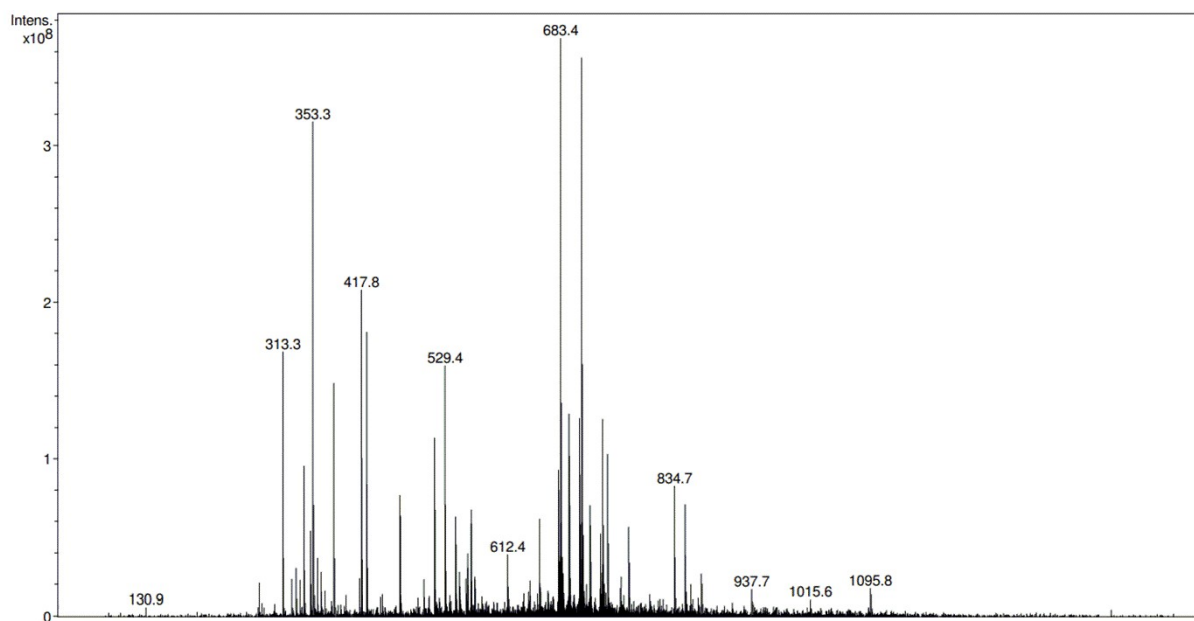

**Figure S5.** a) overlaid proton spectra of the compounds **3a** and **3a-4** (signals from solvent impurities are marked with asterisk\*), b) COSY spectrum and c) MS spectrum of the compound **3a-4**.

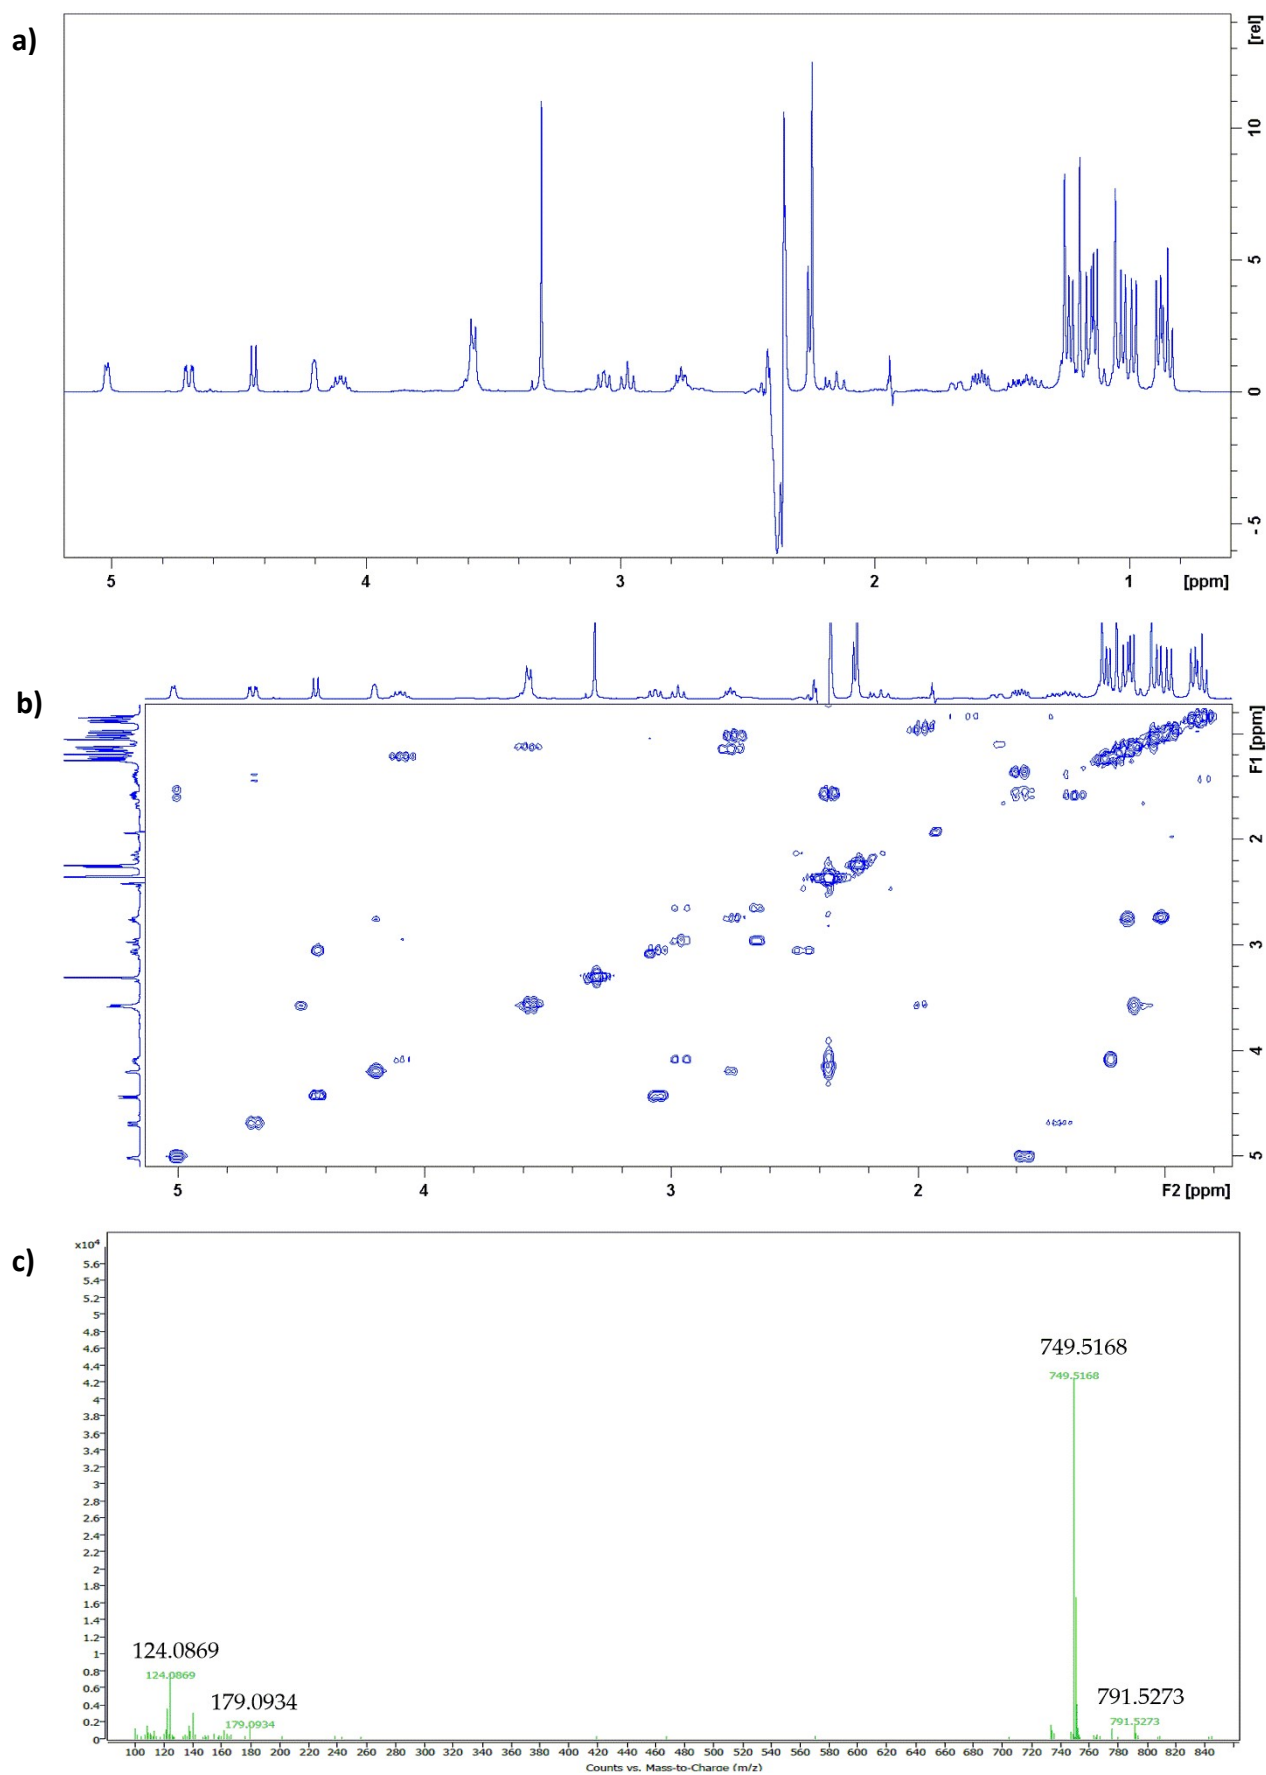

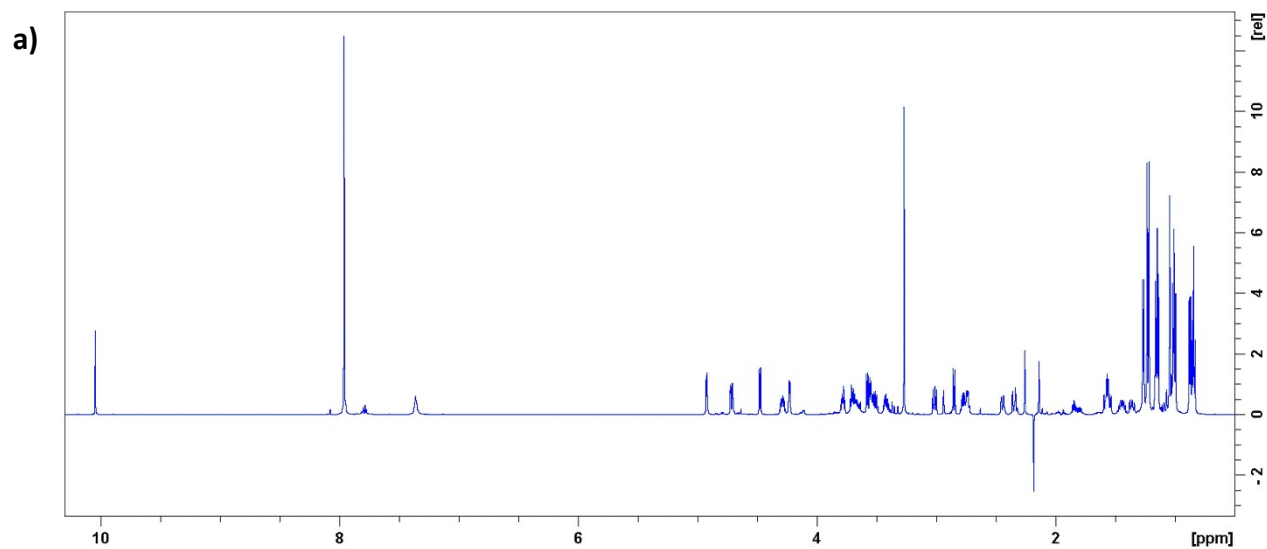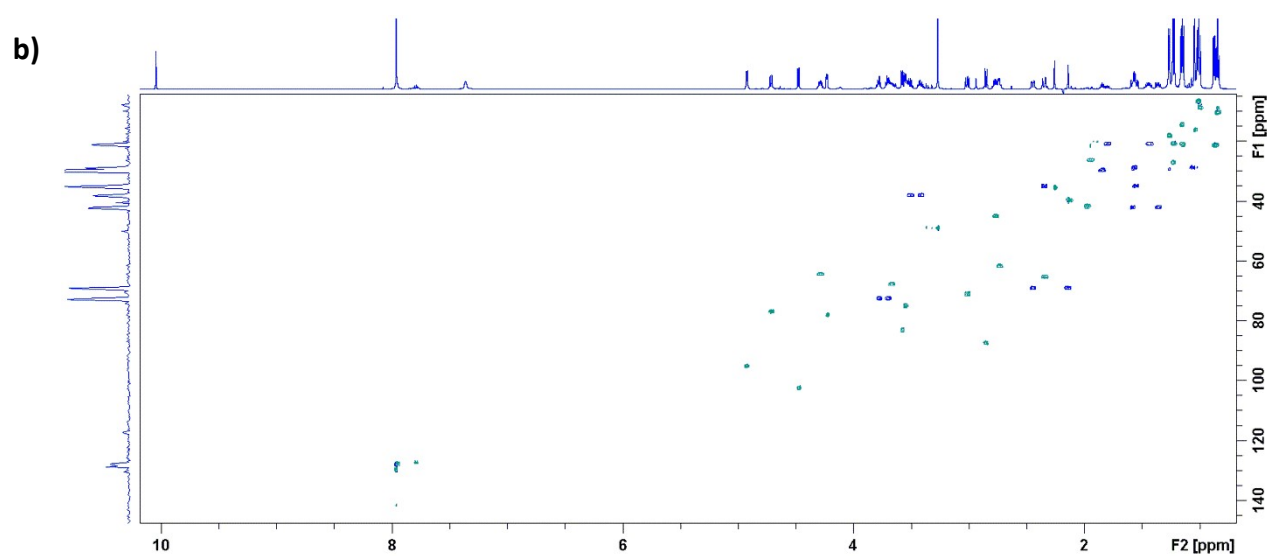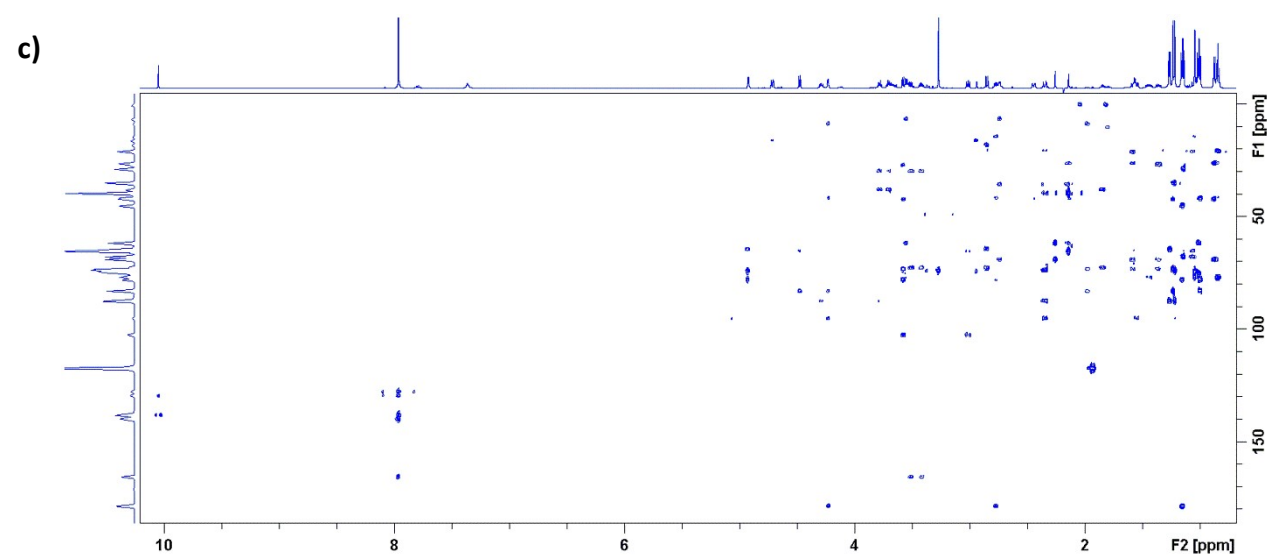

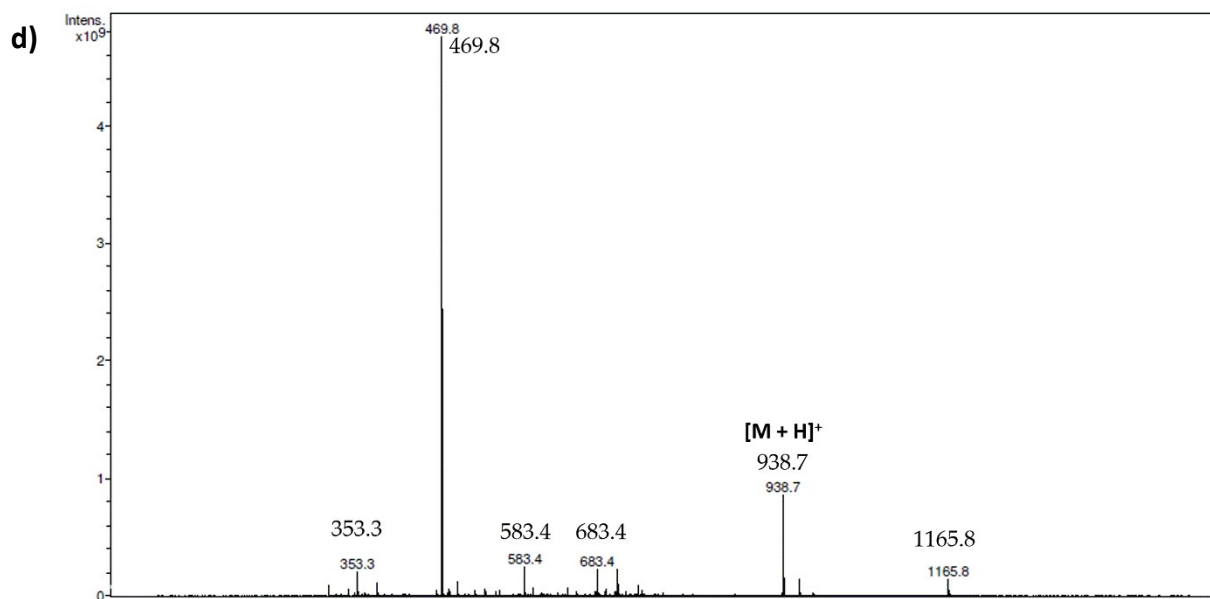

**Figure S7.** a) proton spectrum, b) HSQC spectrum, c) HMBC spectrum and d) MS spectrum of the compound **3a-6**.

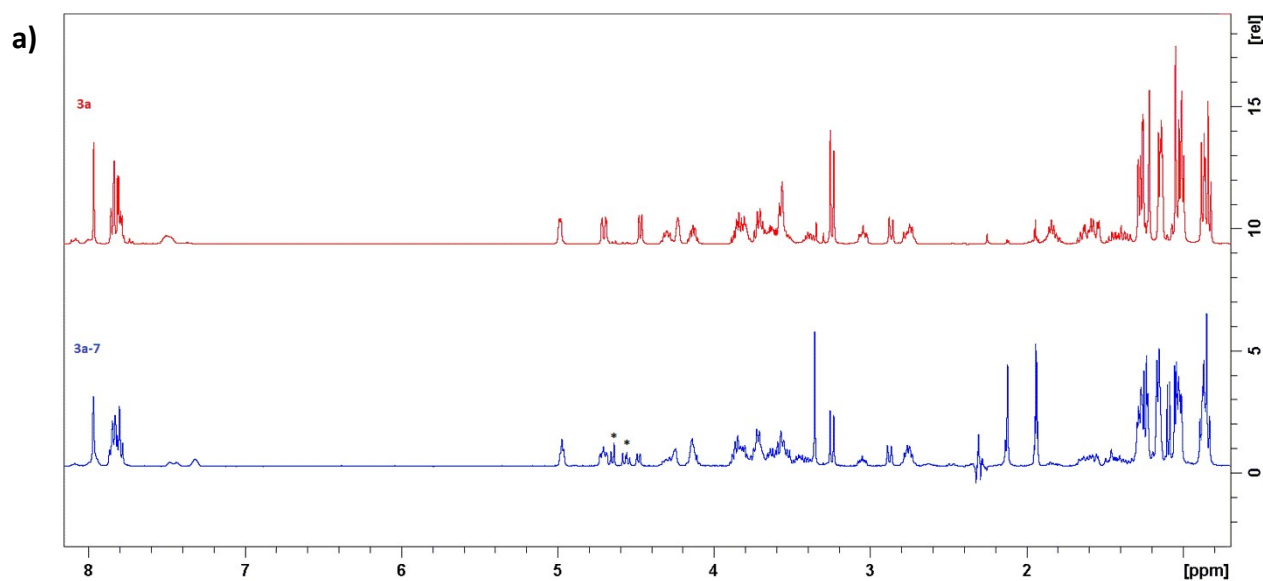

b)

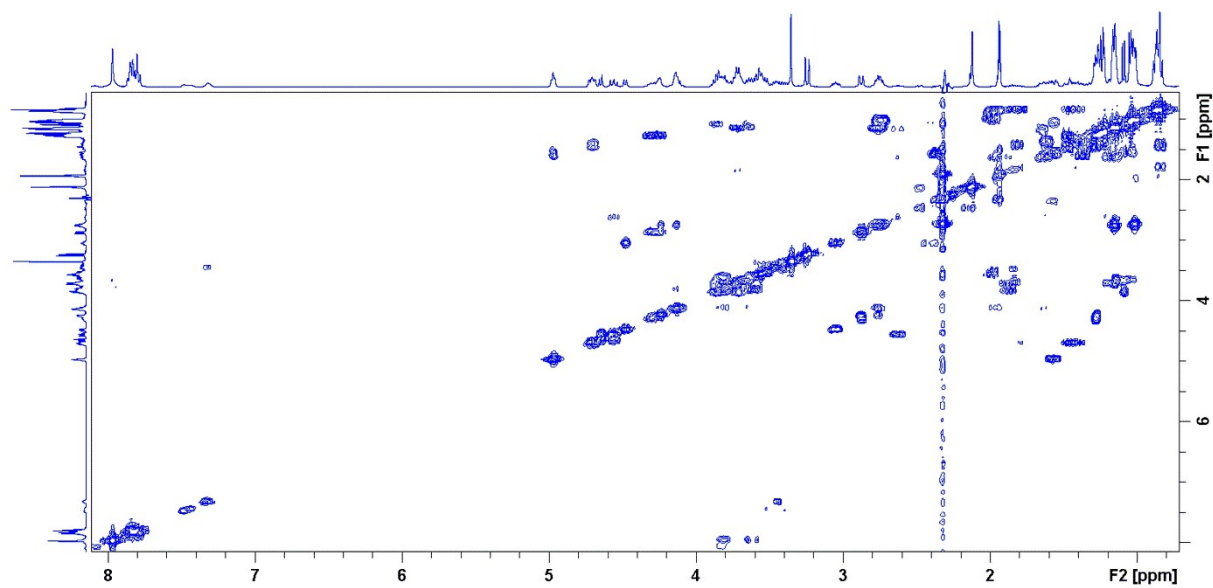

c)

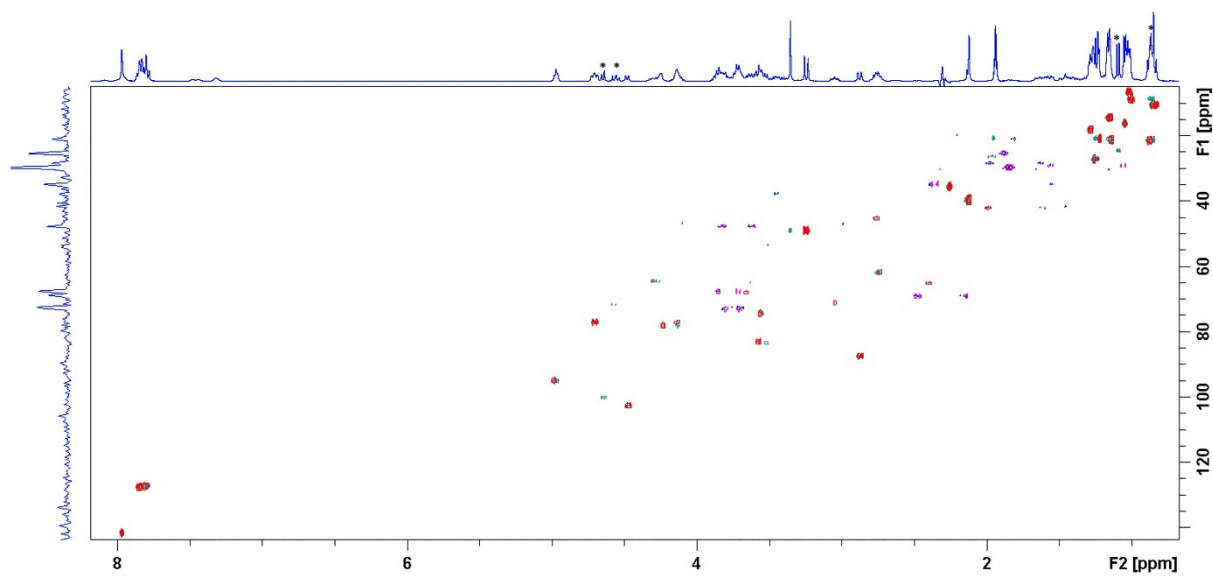

d)

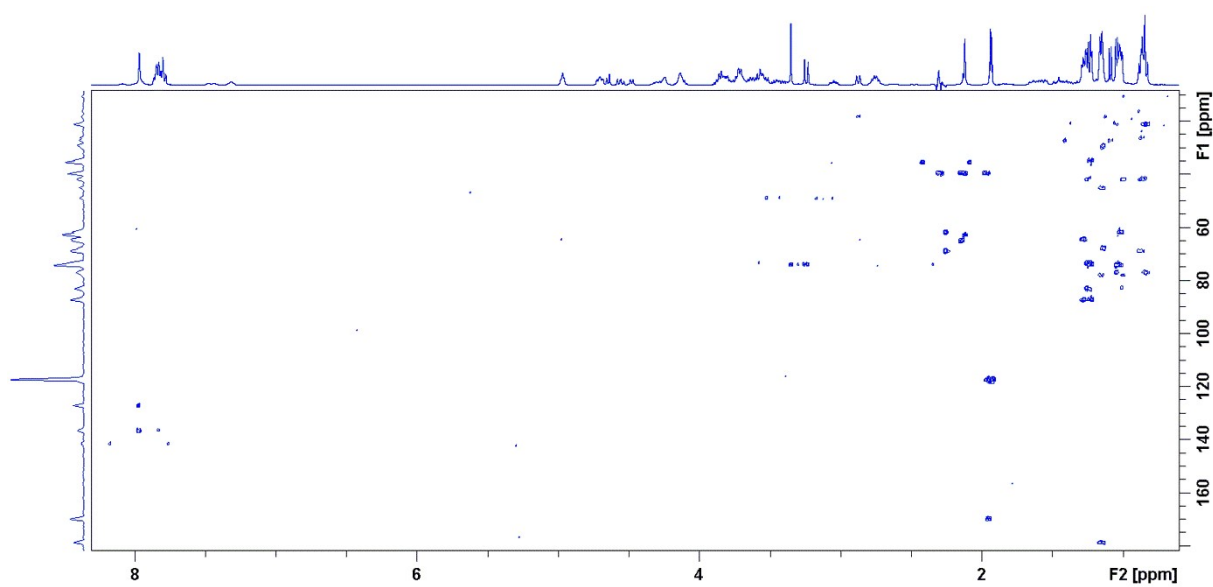

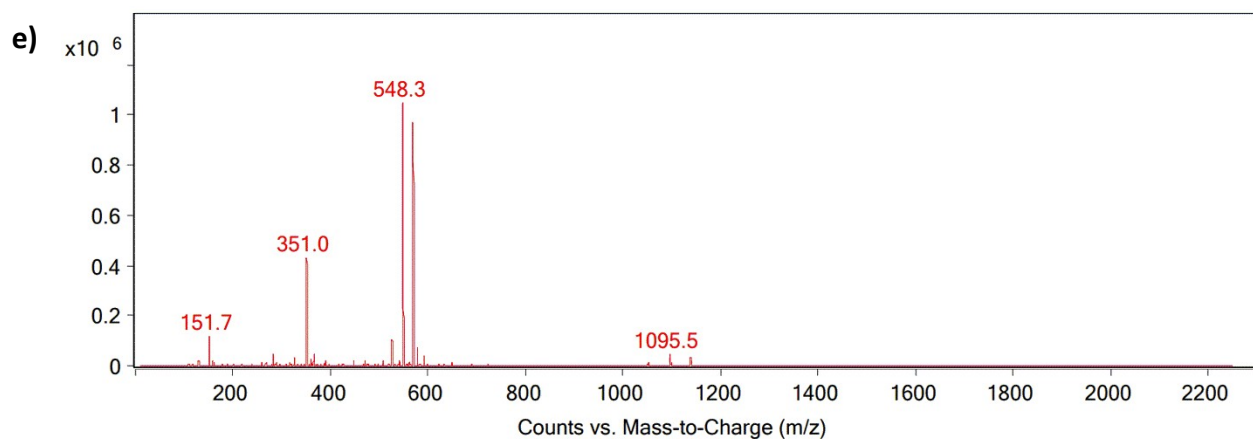

**Figure S8.** a) overlaid proton spectra of the **3a-7** and **3a**, b) COSY spectrum, c) overlaid HSQC spectrum of the **3a-7** and **3a** (blue and green contours belong to the **3a-7**, while red and pink contours belong to the **3a**; signals from unknown impurities are marked with asterisk\*), d) HMBC spectrum and e) MS spectrum of the compound **3a-7**.

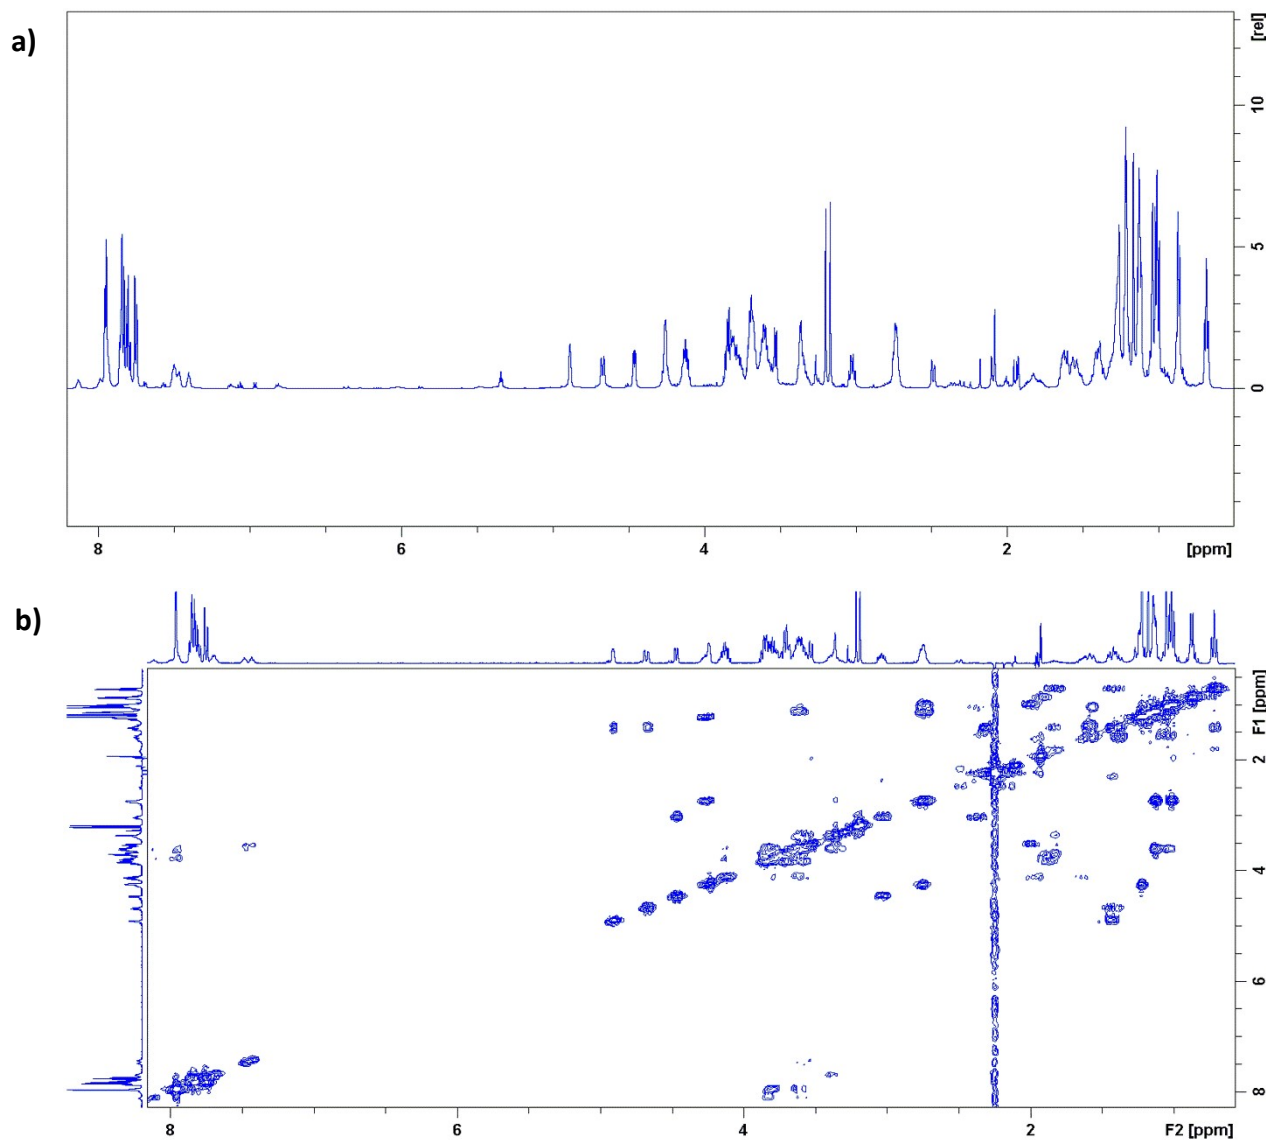

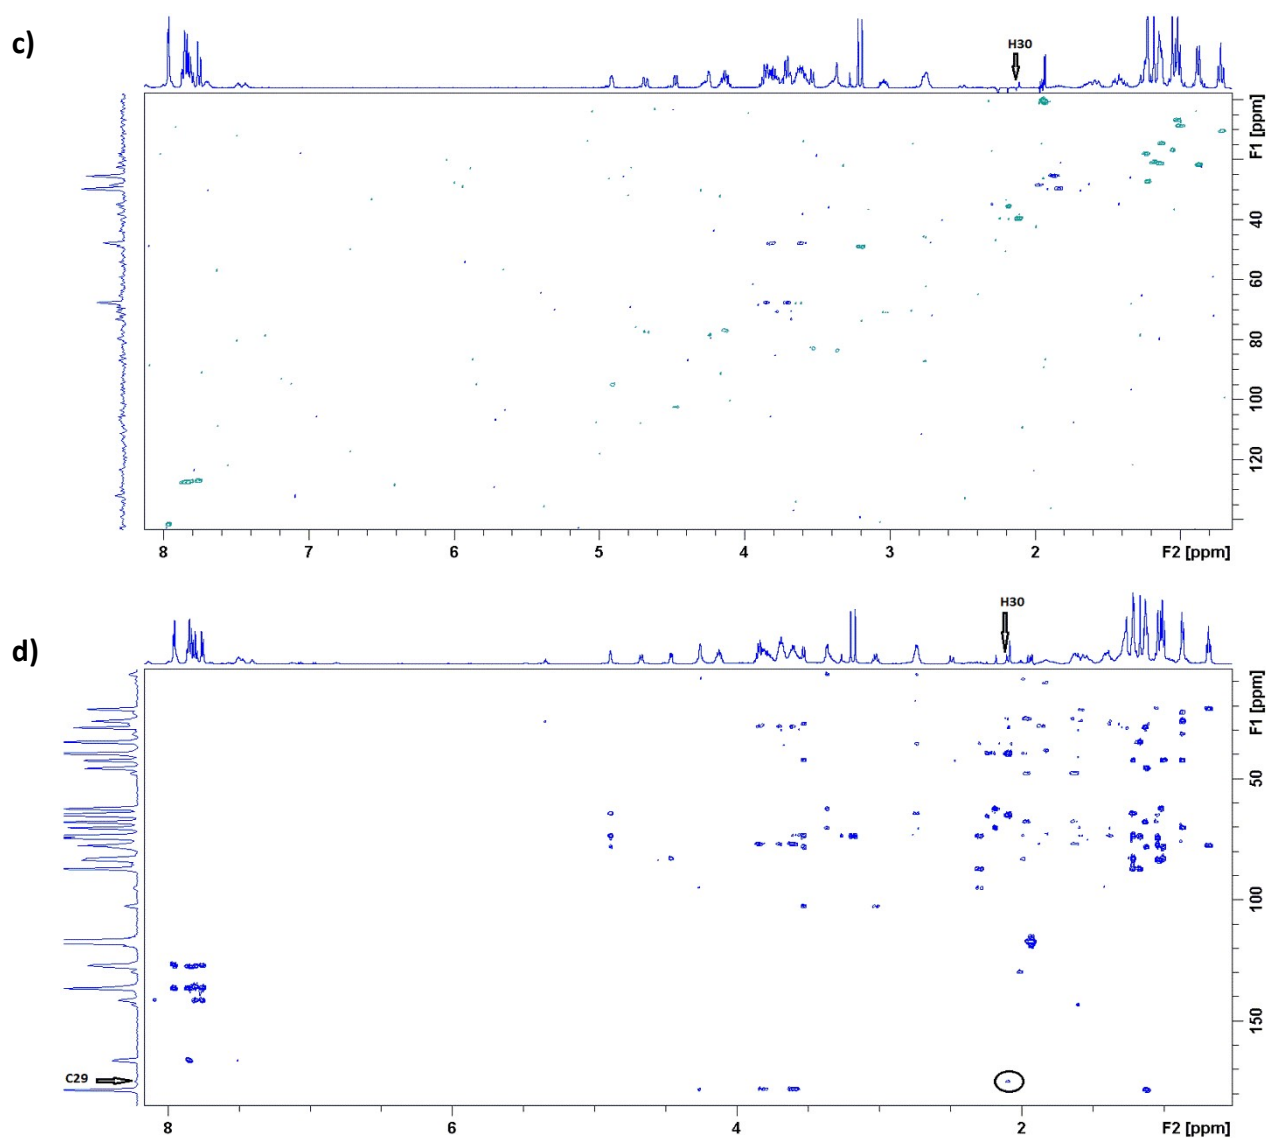

**Figure S9.** a) proton spectrum, b) COSY spectrum, c) HSQC spectrum, d) HMBC spectrum of the compound **3a-8**. HMBC correlation of a methyl group protons H30 with a carbonyl group C29 is marked in black.

**Table S1.**  $^1\text{H}$  and  $^{13}\text{C}$  chemical shifts of compound **3a-7**

| Compound |                                 |                                    | 3a-7     |                                 |                                    |
|----------|---------------------------------|------------------------------------|----------|---------------------------------|------------------------------------|
| Atom     | $\delta(^1\text{H})/\text{ppm}$ | $\delta(^{13}\text{C})/\text{ppm}$ | Atom     | $\delta(^1\text{H})/\text{ppm}$ | $\delta(^{13}\text{C})/\text{ppm}$ |
| 1        | -                               | 178.8                              | 22       | 7.97                            | 141.6                              |
| 2        | 2.76                            | 45.3                               | 4''- 22a | - <sup>a</sup>                  | -                                  |
| 2Me      | 1.16                            | 14.38                              | 4''- 22b | 7.99                            | -                                  |
| 3        | 4.24                            | 78.2                               | 23       | -                               | - <sup>a</sup>                     |
| 4        | 1.98                            | 41.83                              | 24       | 3.82; 3.65                      | 47.8                               |

|                   |                |                |                          |                |        |
|-------------------|----------------|----------------|--------------------------|----------------|--------|
| <b>4Me</b>        | 1.01           | 8.77           | <b>25</b>                | 4.14           | 77.85  |
| <b>5</b>          | 3.58           | 83.2           | <b>26</b>                | 1.98; 1.64     | 28.35  |
| <b>6</b>          | -              | 73.5           | <b>27</b>                | 1.89           | 25.45  |
| <b>6Me</b>        | 1.25           | 27.23          | <b>28</b>                | 3.86; 3.73     | 67.6   |
| <b>6OH</b>        | - <sup>a</sup> | -              | <b>1'</b>                | 4.48           | 102.69 |
| <b>7eq; 7ax</b>   | 1.46           | 41.6           | <b>2'</b>                | 3.05           | 71.04  |
| <b>8</b>          | 1.98           | 26.16          | <b>2'OH</b>              | - <sup>a</sup> | -      |
| <b>8Me</b>        | 0.87           | 21.43          | <b>3'</b>                | 2.40           | 65.05  |
| <b>9eq; 9ax</b>   | 2.48; 2.15     | 69.0           | <b>3'NMe<sub>2</sub></b> | 2.12           | 39.72  |
| <b>9a-N</b>       | 2.26           | 35.56          | <b>4'eq; 4'ax</b>        | 1.57; 1.06     | 29.12  |
| <b>10</b>         | 2.75           | 62.0           | <b>5'</b>                | 3.66           | 67.9   |
| <b>10Me</b>       | 1.02           | 6.63           | <b>5'Me</b>              | 1.15           | 21.11  |
| <b>11</b>         | 3.66           | 67.7           | <b>1''</b>               | 4.97           | 95.0   |
| <b>11OH</b>       | - <sup>a</sup> | -              | <b>2''eq; 2''ax</b>      | 2.37; 1.58     | 34.92  |
| <b>12</b>         | -              | 74.6           | <b>3''</b>               | -              | 74.1   |
| <b>12Me</b>       | 1.05           | 16.17          | <b>3''Me</b>             | 1.24           | 20.8   |
| <b>12OH</b>       | - <sup>a</sup> | -              | <b>3''OMe</b>            | 3.25           | 49.1   |
| <b>13</b>         | 4.71           | 77.1           | <b>4''</b>               | 2.88           | 87.4   |
| <b>14eq; 14ax</b> | 1.82; 1.46     | 21.06          | <b>4''- a</b>            | 3.82; 3.71     | 72.7   |
| <b>14Me</b>       | 0.85           | 10.46          | <b>4''- b</b>            | 1.85           | 29.73  |
| <b>15</b>         | -              | - <sup>a</sup> | <b>4''- c</b>            | 3.45           | 37.87  |
| <b>16</b>         | -              | 135.64         | <b>4''- d</b>            | 7.32           | -      |
| <b>17; 21</b>     | 7.84           | 127.5          | <b>5''</b>               | 4.26           | 64.6   |
| <b>18; 20</b>     | 7.81           | 127.2          | <b>5''Me</b>             | 1.28           | 18.21  |
| <b>19</b>         | -              | 136.7          |                          |                |        |

---

<sup>a</sup> not assigned
